# Supplementary material for: Transcriptome Signatures of Atlantic Salmon—Resistant Phenotypes against Sea Lice Infestation Are Associated with Tissue Repair
Source: MDPI journal article supplement (doi:10.3390/genes14050986), 2023-04-27
Supplement: s1 [file s1]

## Supplementary figures

Figure S1. Atlantic salmon families behavior under *C. rogercresseyi* infestation. A) Atlantic salmon families sea lice burden per fish after eleven days of infestation. B) PCA analysis of Atlantic salmon families transcriptome profile.

Figure S2. KEGG pathway and Biological Process enrichment analysis of genes differentially expressed in the R and S Atlantic salmon families during a sea lice infestation.

Figure S3. GO enrichment analysis for non-synonymous SNPs variation in the R and the S Atlantic salmon families.

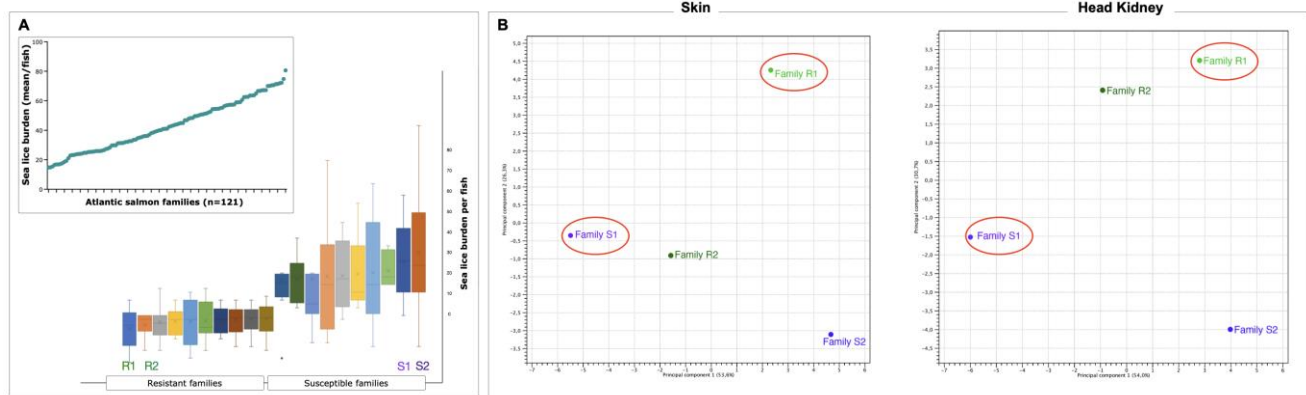

Figure S1.

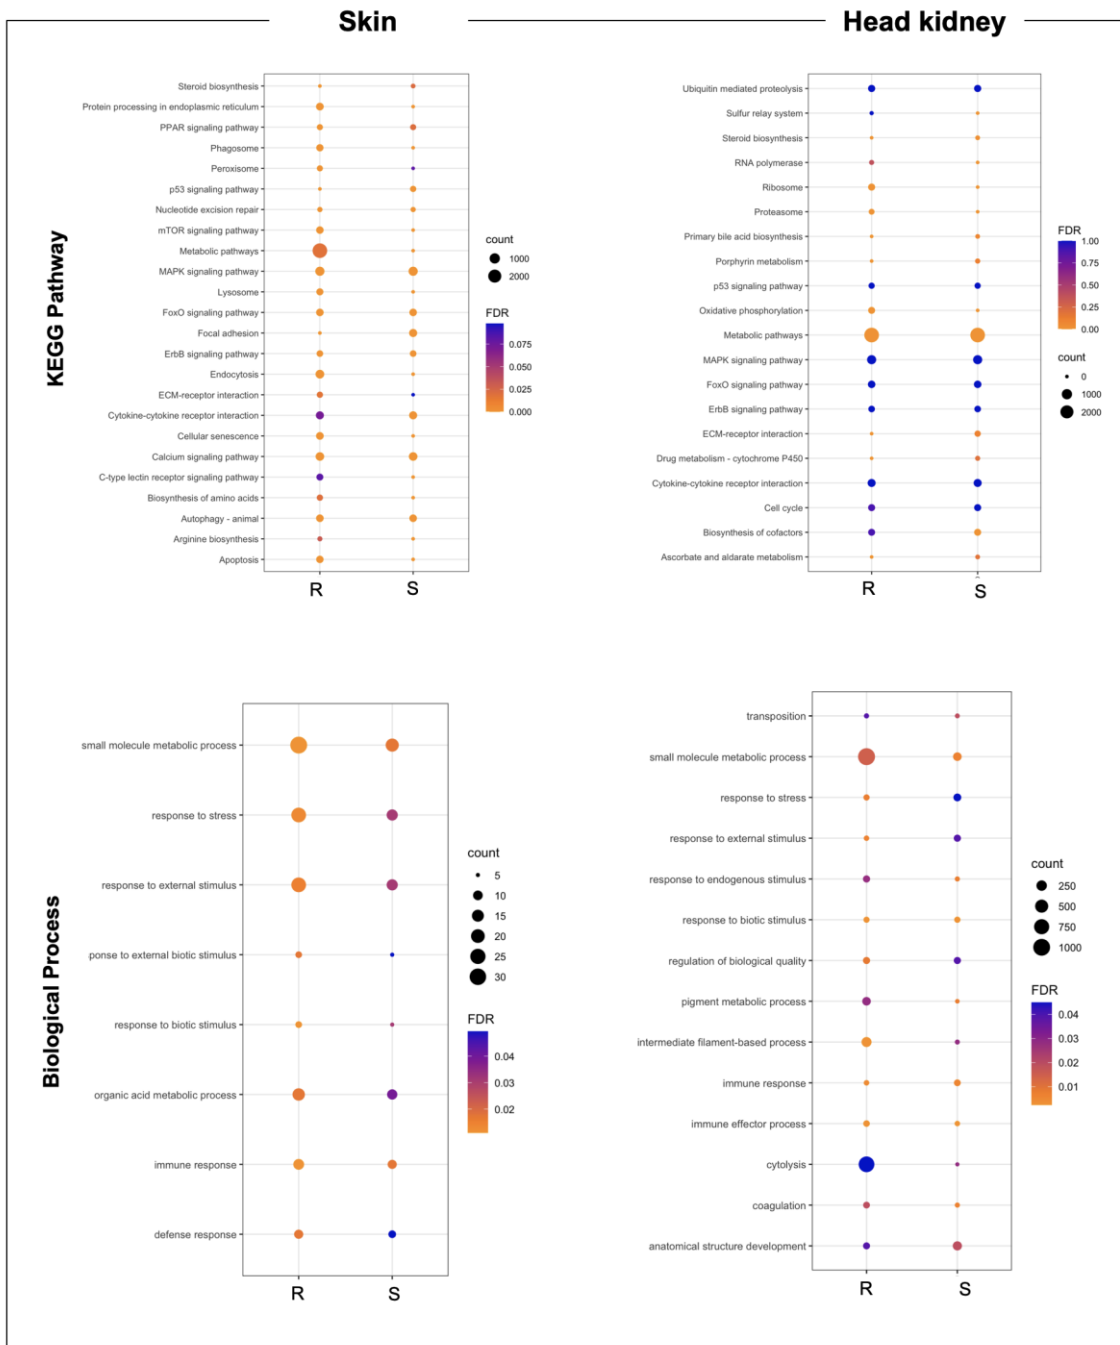

Figure S2.

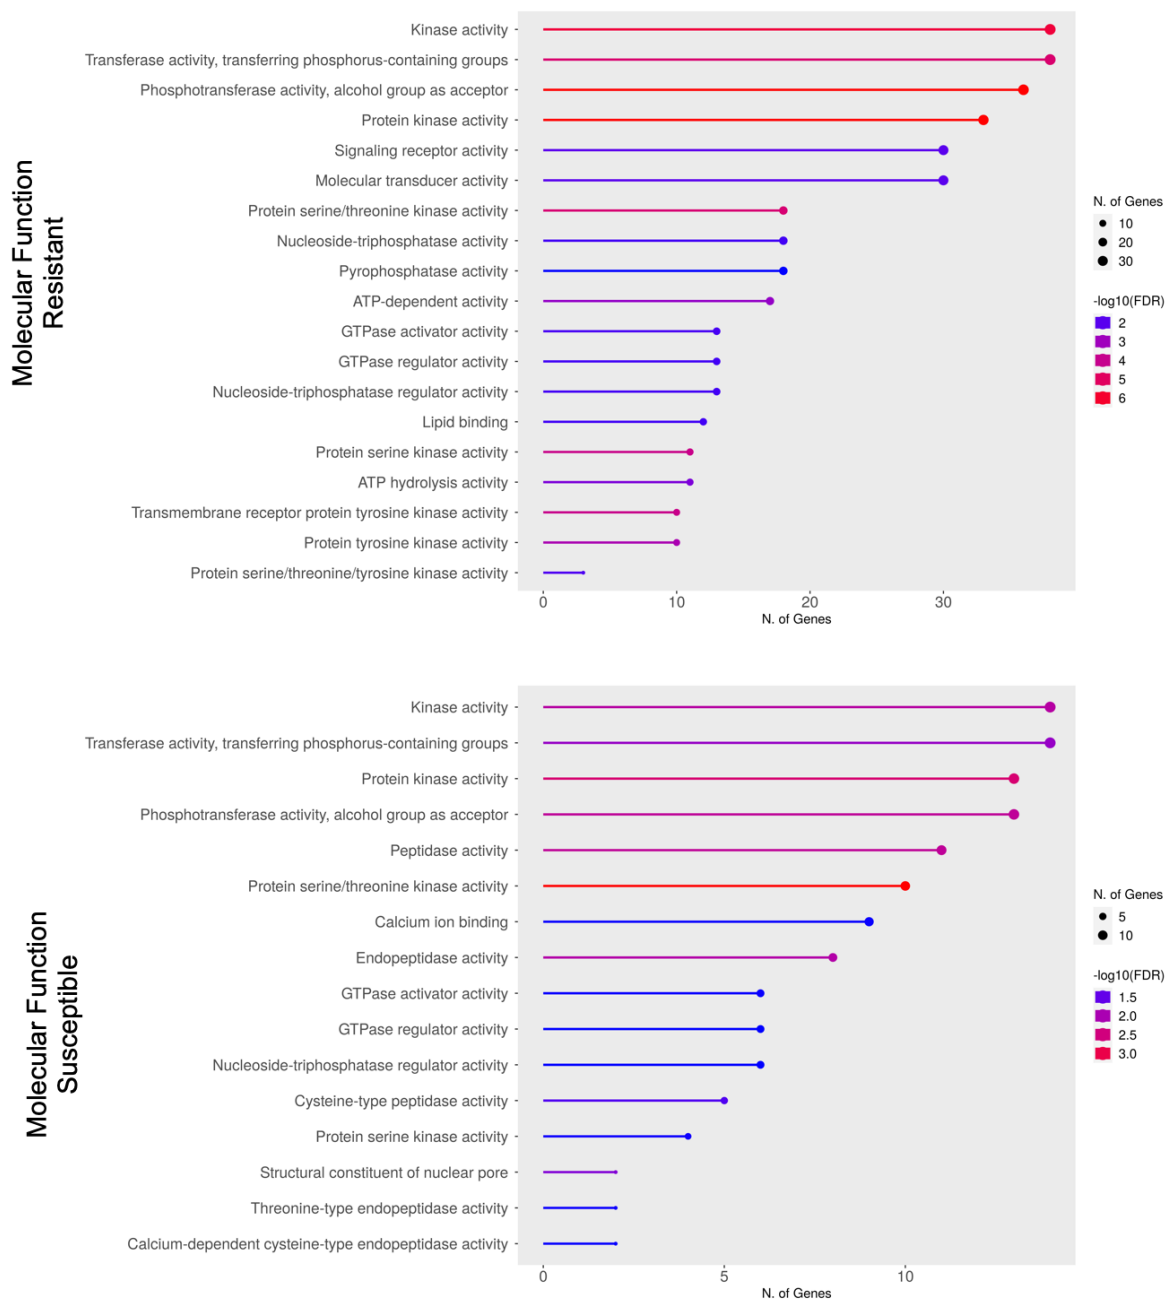

Figure S3.
